# Supplementary material for: Highly efficient and dual broad emitting light convertor: an option for next-generation plant growth LEDs
Source: Royal Society of Chemistry journal article supplement (doi:10.1039/c8tc06115g), 2019-01-01
Supplement: c8tc06115g1.pdf [file c8tc06115g1.pdf]

## **Highly Efficient Dual Broad Emitting Light Converter: An Option for Next-Generation Plant Growth LEDs**

Mingcai Li, <sup>a</sup> Xuejie Zhang, <sup>a</sup> Haoran Zhang, <sup>\*a</sup> Weibin Chen, <sup>a</sup> Li Ma, <sup>b</sup> Xiaojun Wang, <sup>b</sup> Yingliang Liu<sup>a</sup> and Bingfu Lei<sup>a\*</sup>

<sup>a</sup> Guangdong Provincial Engineering Technology Research Center for Optical Agricultural, College of Materials and Energy, South China Agricultural University, Guangzhou 510642, China.

<sup>b</sup> Department of Physics, Georgia Southern University, Statesboro, GA 30460, USA.

\*Corresponding authors.

E-mail addresses: tleibf@scau.edu.cn (B.F. Lei)

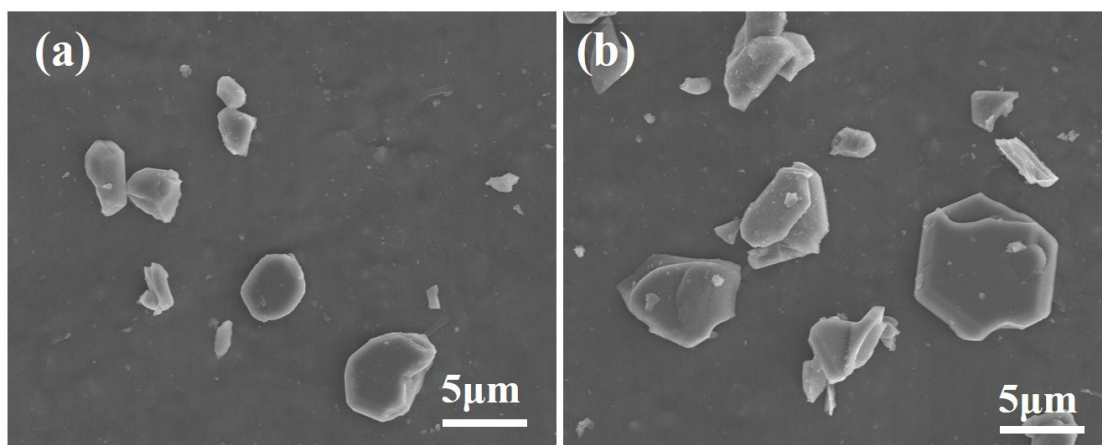

**Figure S1.** (a)–(b) SEM of BAM phosphor

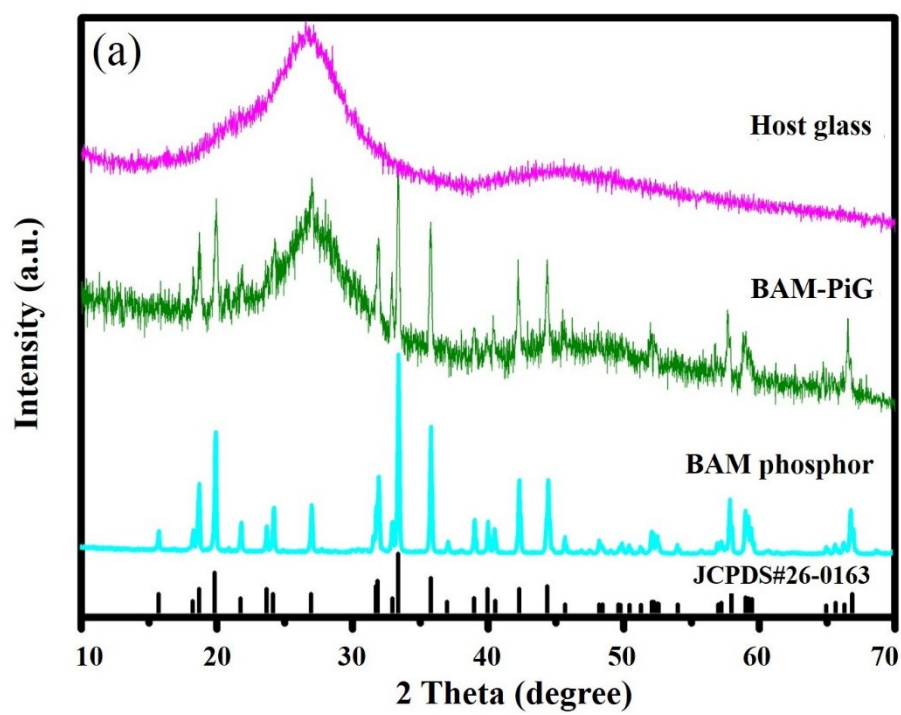

**Figure S2.** (a) XRD patterns of host glass, BAM-PiG and BAM-Phosphor.

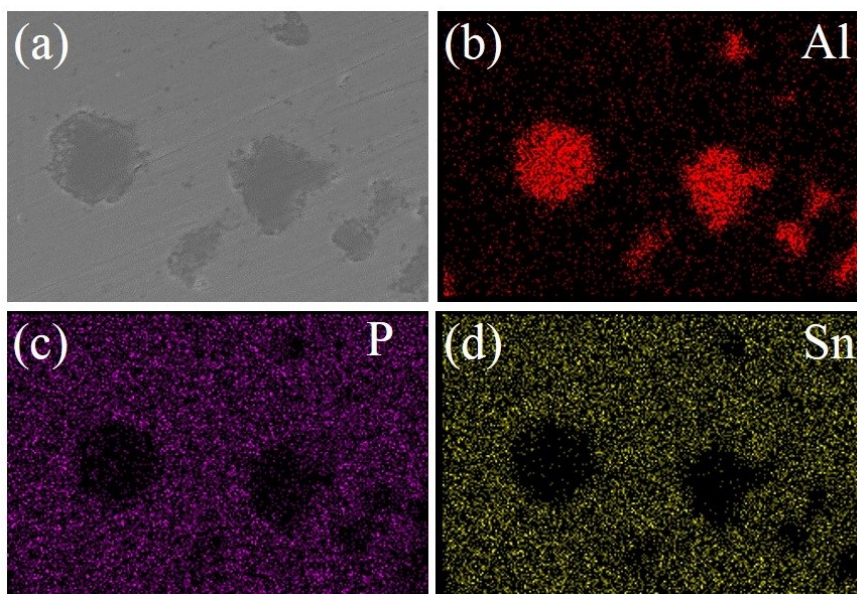

**Figure S3.** (a-d) EDS mapping images of BAM-PiG.

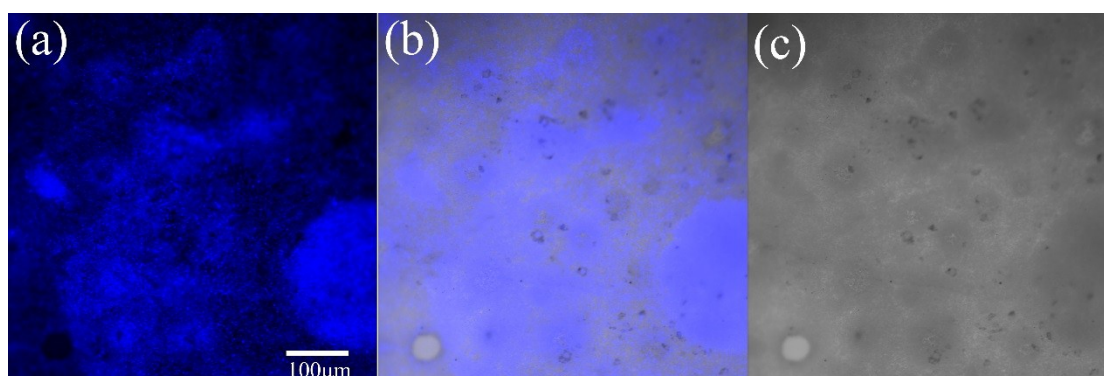

**Figure S4.** (a) CLSM images of BAM-PiG; (b) The superposition of brightfield and darkfield; (c) only darkfield.

**Table S1.** The quantum efficiency of CASN-PiG, BAM-PiG and Dual-PiGP under different phosphor content

| Samples   | 0.1%  | 0.5%  | 1.0%  | 1.5%  | 2.0%  |
|-----------|-------|-------|-------|-------|-------|
| CASN-PiG  | 29.10 | 62.62 | 71.82 | 84.54 | 94.42 |
| BAM-PiG   | 15.22 | 50.32 | 76.31 | 83.70 | 93.5  |
| Dual-PiGP | 25.32 | 58.51 | 72.93 | 85.22 | 93.90 |

**Table S2.** The quantum efficiency of Dual-PiGP and Mixture-PiG under different phosphor content

| Samples     | 0.1%  | 0.5%  | 1.0%  | 1.5%  | 2.0%  |
|-------------|-------|-------|-------|-------|-------|
| Dual-PiGP   | 25.31 | 58.51 | 72.94 | 85.26 | 93.90 |
| Mixture-PiG | 22.92 | 50.31 | 58.42 | 73.30 | 81.12 |
